# Supplementary material for: A Two-Component Parameterization of Marine Ice Nucleating Particles Based on Seawater Biology and Sea Spray Aerosol Measurements in the Mediterranean Sea
Source: Copernicus journal article supplement (doi:10.5194/acp-2020-487), 2020-06-23
Supplement: Supplementary file 1 [file acp-2020-487-supplement.pdf]

## Supporting Information

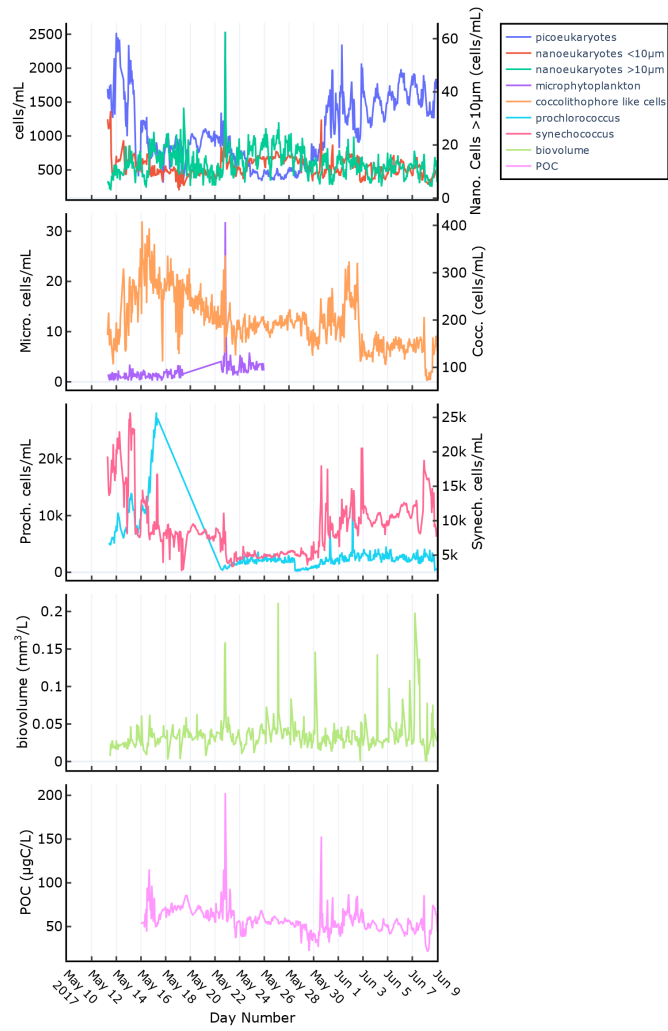

**Figure S1. Underway measurements.**

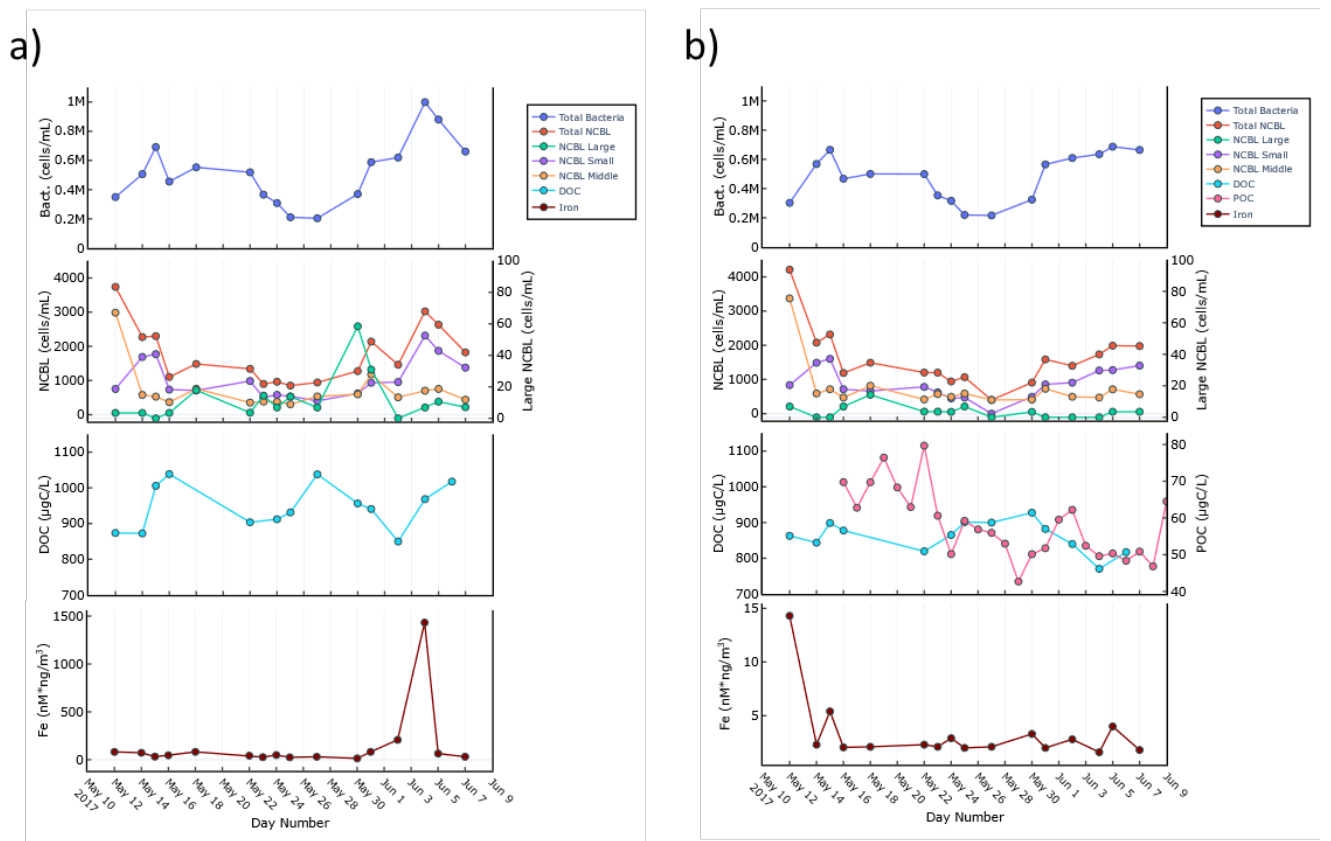

Figure S2. Various biogeochemical measurements in the SML (left) and SSW (right).

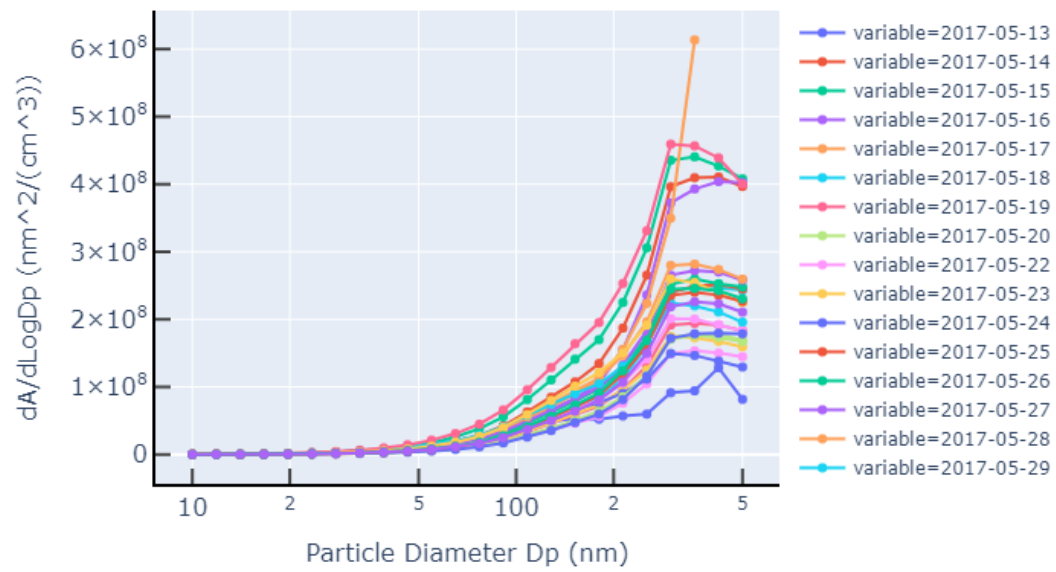

**Figure S3. Daily average surface area distributions of SSA as observed by scanotron.**

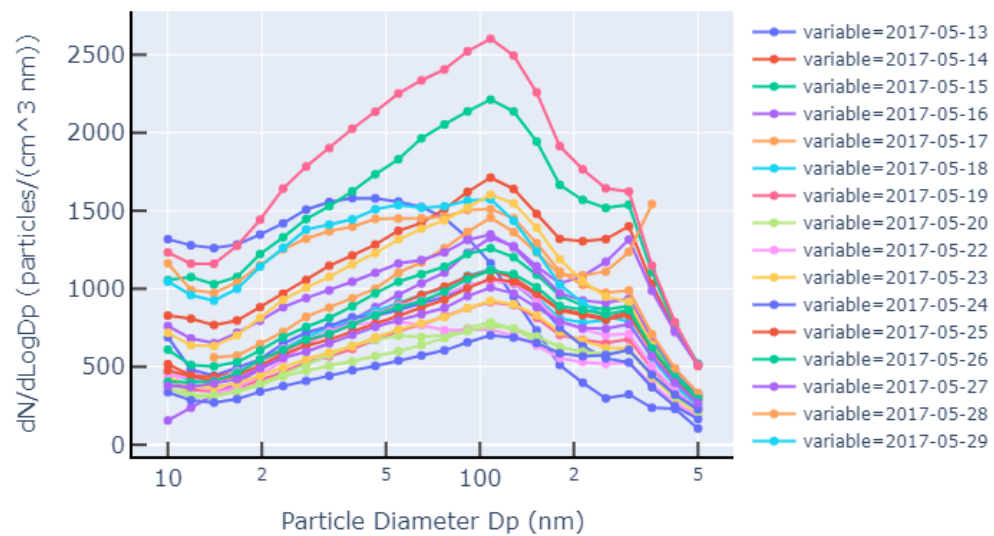

**Figure S4. Daily average number size distributions of SSA as observed by scanotron.**

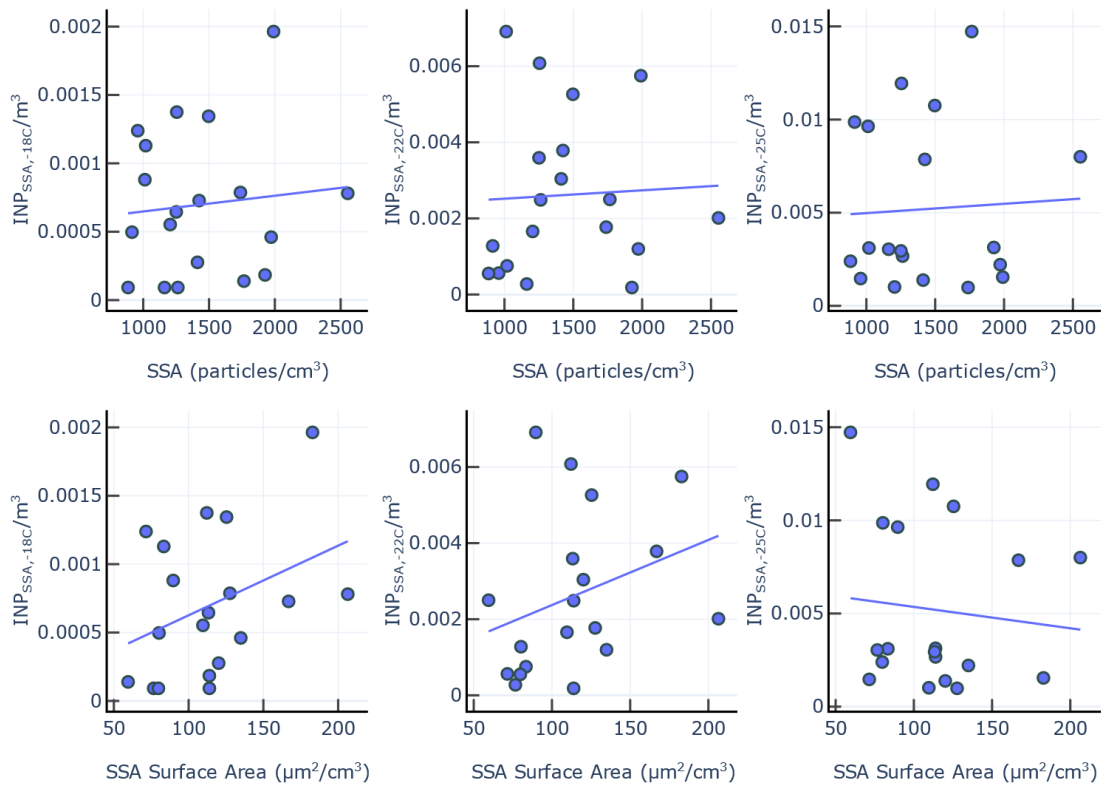

**Figure S5 Correlation matrix for SSA particle concentration and surface area with INP<sub>SSA</sub> at -18C, -22C, and -25C.**

**Table S1. Significant Correlations for INP<sub>SSA,22C</sub>**

| <b>Variable</b> | <b>p</b> | <b>R (R<sup>2</sup>)</b> | <b>n</b> |
|-----------------|----------|--------------------------|----------|
| <b>SSW</b>      |          |                          |          |
| Micro NCBL      | .01      | 0.68 (0.46)              | 12       |
| Prochlorococcus | .002     | 0.59 (0.35)              | 16       |
| POC             | .04      | 0.51 (0.26)              | 16       |
| <b>SSA</b>      |          |                          |          |
| OC              | .01      | 0.66 (0.44)              | 13       |
| WSOC            | .03      | 0.51 (0.26)              | 19       |
