# Supplementary material for: A Two-Component Parameterization of Marine Ice Nucleating Particles Based on Seawater Biology and Sea Spray Aerosol Measurements in the Mediterranean Sea
Source: Copernicus journal article supplement (doi:10.5194/acp-2020-487), 2020-06-23
Supplement: Supplementary file [file acp-2020-487-AC1-supplement.pdf]

1 We thank the reviewer for carefully reading our manuscript and for their thoughtful responses. The  
2 recommendations they gave were very valuable and have helped us to improve the paper. We have  
3 made many changes to the paper per the reviewer's request. Notably, we added information on the  
4 comparison of our results to the literature and proposed additional parameterizations for an easier use  
5 from the community. However, the conclusions and main message of the paper did not change.

6

7 Before proceeding to specific comments, we first will describe the changes made to the calculation of  
8 surface area normalized INP concentrations, as this is the basis for the rest of the changes to the  
9 manuscript.

10 First, we calculated adjusted daily mean particle size distribution based on sampling time intervals  
11 from the differential mobility particle sizer (DMPS) that aligned better with when the filters later  
12 analyzed by the Dynamic filter processing chamber (DFPC) were collecting particles. In our original  
13 manuscript, daily means of DMPS data were calculated on a 24-hour time interval beginning and  
14 ending at midnight. As DFPC filter samples were not collected at these exact times, there existed a  
15 small misalignment between DMPS and DFPC sampling intervals. We therefore re-calculated the  
16 DMPS daily mean across each DFPC sampling period. We also did the same adjustment for daily  
17 means of underway data when comparing underway data to the DFPC INP concentrations. We added  
18 error bars to represent the standard deviation throughout each sampling period to the resulting size  
19 distributions, produced from the bubbling system during each DFPC sampling period, shown in  
20 Figure R1. This figure has been added to the supporting information as Figure S3 on line 18.

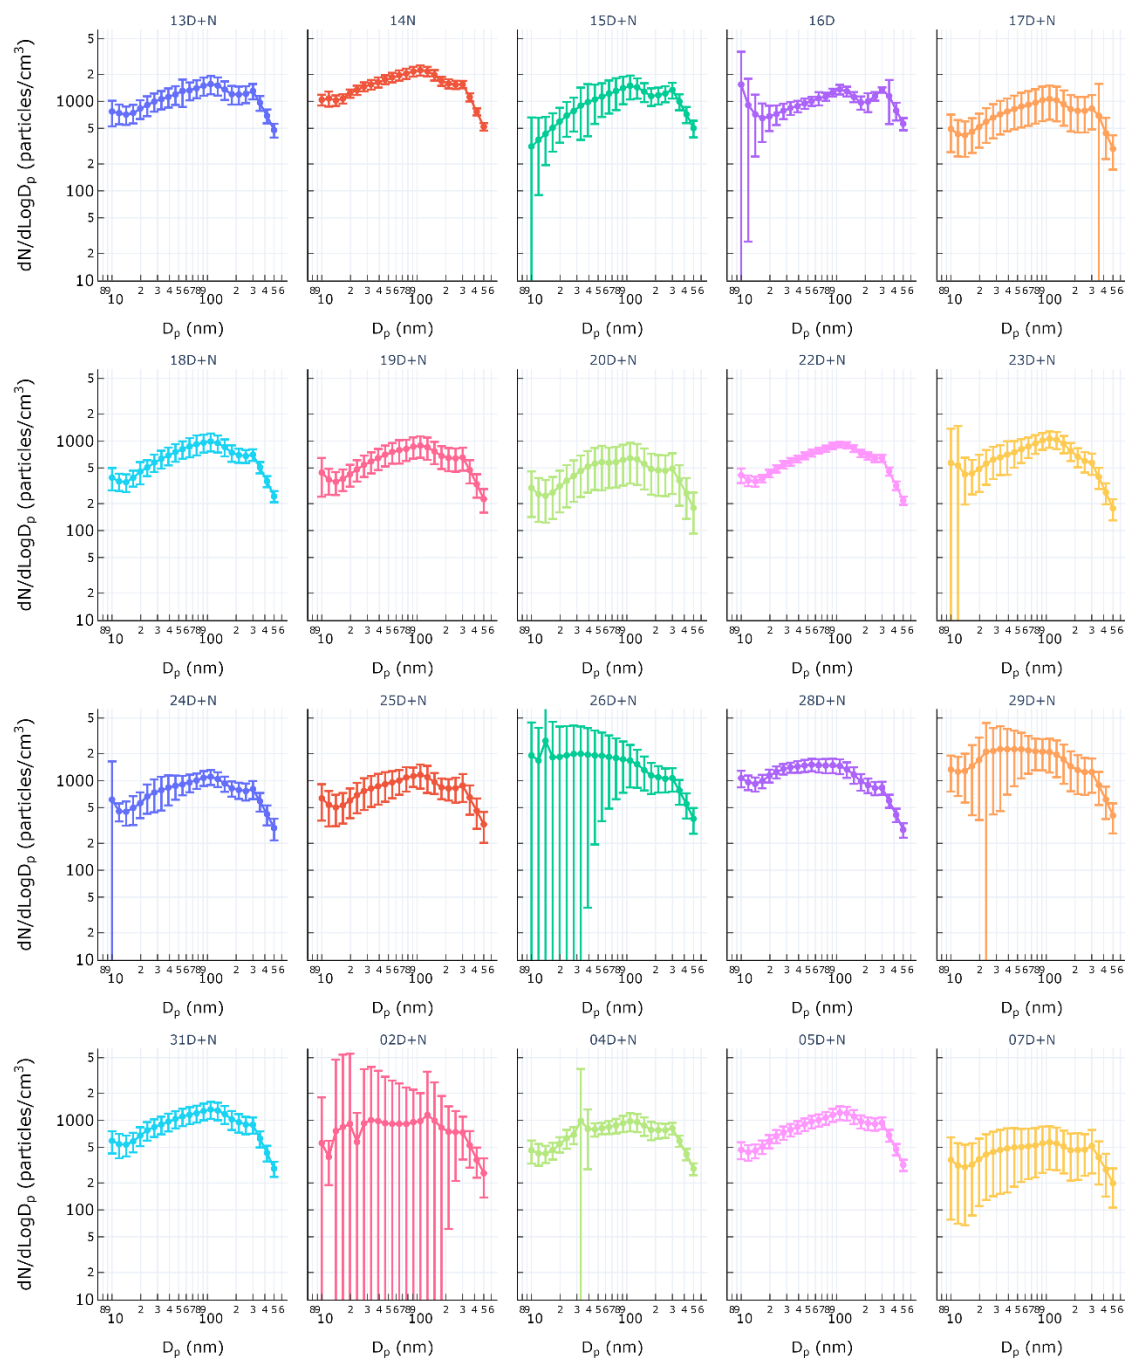

21 **Figure R1.** Average size distributions of SSA produced by the plunging apparatus as observed by DMPS across  
 22 each DFPC sampling period. Error bars represent standard deviation.  
 23

24 Both reviewers expressed concern that the DMPS data used to calculate surface area of SSA that did  
 25 not include particles above 500 nm in diameter. The reviewers correctly pointed out that an additional  
 26 mode at 800 nm exists, which contains a large portion of SSA surface area. Ovadneveite et al. (2014)  
 27 developed a sea spray aerosol source function consisting of 5 log-normal modes based on in-situ  
 28 particle number concentration measurements at Mace Head and open-ocean eddy correlation flux  
 29 measurements from the Eastern Atlantic. Comparison of parameters from their fit with those from the  
 30 fit of our number-size distribution revealed good agreement between the two. The parameters are  
 31 shown in Table R1 below. This table has been added to the SI on line 1 as Table S1.

32 **Table R1.** Lognormal parameters for a sea spray source function parameterization from Ovadneveite et al.  
 33 (2013) and for the fit of observed particle counts during the PEACETIME cruise. For each mode (i), a geometric  
 34 standard deviation ( $\sigma_i$ ), count-median diameter ( $CMD_i$ ), and total number flux ( $F_i$ ) or amplitude is shown. For  
 35 the fit from the literature (Ovadnevaite et al., 2014).  $F_i$  is a function of Reynolds number  $Re_{HW}$  which we  
 36 selected as  $3.1 \times 10^6$  based on the air flow across the surface of the water in our bubbling apparatus.

| i                                | $\sigma_i$ | $CMD_i$ | $F_i$ /Amplitude                         |
|----------------------------------|------------|---------|------------------------------------------|
| <b>Ovadneveite et al. (2013)</b> |            |         |                                          |
| 1                                | 1.37       | 0.018   | $104.5(Re_{HW} - 1 \times 10^5)^{0.556}$ |
| 2                                | 1.5        | 0.041   | $0.0442(Re_{HW} - 1 \times 10^5)^{1.08}$ |
| 3                                | 1.42       | 0.09    | $149.6(Re_{HW} - 1 \times 10^5)^{0.545}$ |
| 4                                | 1.53       | 0.23    | $2.96(Re_{HW} - 1 \times 10^5)^{0.79}$   |
| 5                                | 1.85       | 0.83    | $0.51(Re_{HW} - 1 \times 10^5)^{0.87}$   |
| <b>PEACETIME Cruise</b>          |            |         |                                          |
| 1                                | 1.5        | 0.01    | 0.01                                     |
| 2                                | 1.75       | 0.035   | 0.025                                    |
| 3                                | 1.7        | 0.115   | 0.031                                    |
| 4                                | 1.4        | 0.300   | 0.01                                     |

37 We next took the ratio of mode 5 to mode 3 from the Ovadnevaite (2014) fit and applied it to our fit to  
 38 calculate a fifth mode accounting for particles ranging in size between 500 nm and 10  $\mu$ m. Figure R2  
 39 shows an example of the result of this process using daily mean data from March 18. The total fit is  
 40 shown in gray, which consists of modes 1-4 as calculated from our DMPS data, as well as mode 5  
 41 calculated as described above. Blue circles represent observed values.

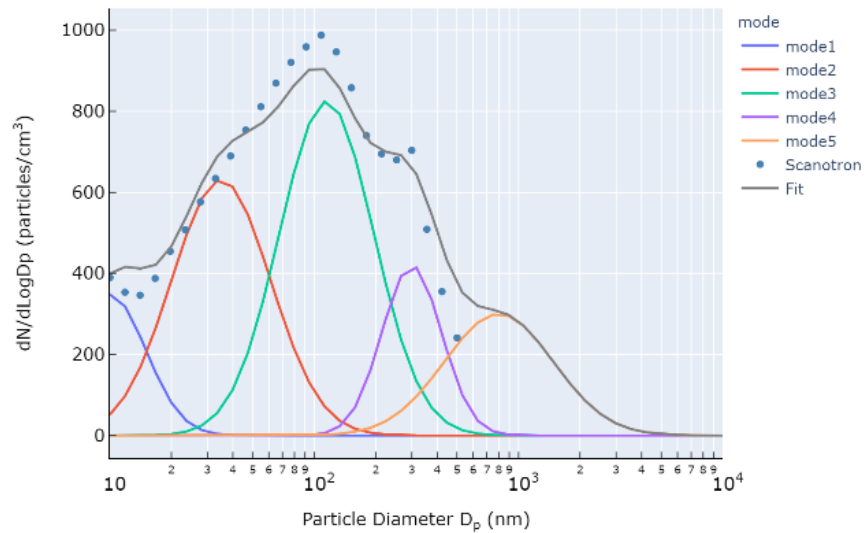

42 **Figure R2.** Example of resulting size distribution fit based on comparison of fit from observed PEACETIME  
 43 particle counts with a 5 lognormal-mode fit from the literature (Ovadneveite et al., 2014). Blue markers denote  
 44 particle counts by the DMPS instrument (named Scanotron). Modes 1-4 are fit based on observed data. Mode 5  
 45 is calculated by taking the ratio of Mode 5/3 from the Ovadneveite et al. (2014) fit and applying it to our  
 46 observed mode 3.

47 We applied this calculation to the mean data from the DMPS for each DFPC sampling period. From  
 48 the resulting fits, we calculated aerosol surface area distribution, shown in Figure R3 (also found on  
 49 line 22 of the Supporting Information as Figure S4). Finally, we used this adjusted surface area value  
 50 to re-calculate surface area normalized INP concentrations. We have added description of this  
 51 calculation to the main text on line 172.

52 Where relevant throughout the remainder of this text, we will refer readers to this initial comment.

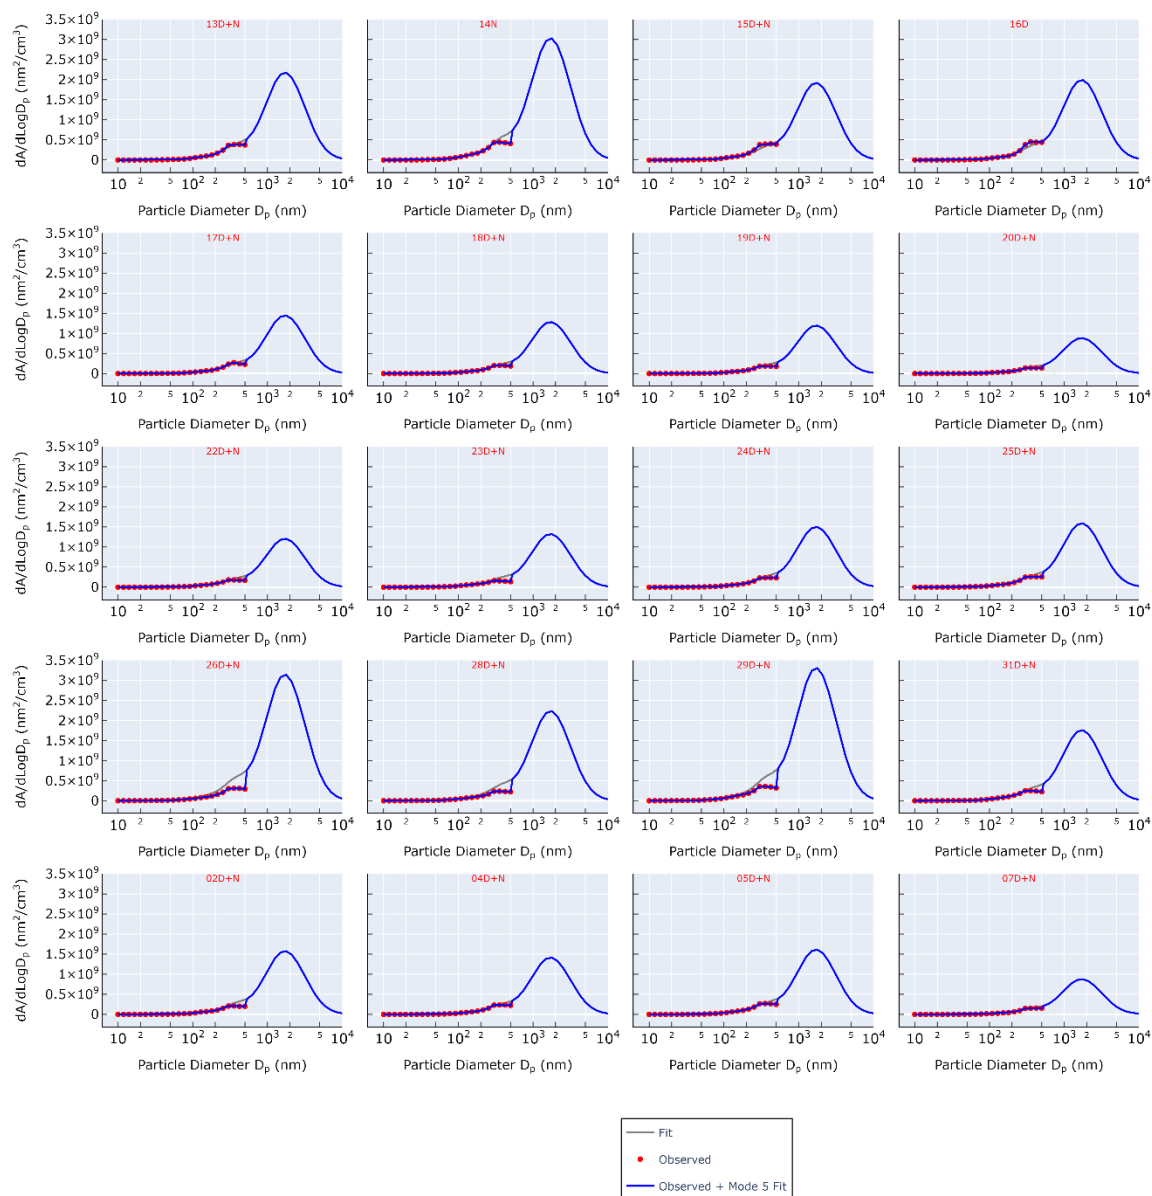

53  
 54 **Figure R3.** Daily average of adjusted SSA surface area distributions. Sampling time is indicated in red text at  
 55 the top of each plot, where numbers indicate the day of the month and D/N indicates whether sampling was  
 56 conducted at day/night, respectively. The gray line shows the combined fit of modes 1-4 from observed data  
 57 with the additional contribution of mode 5 as calculated using the Ovadnevaite et al. (2013) fit . Red circles  
 58 represent observed values and blue line represents the surface area from observed values through 500nm plus  
 59 theoretical contribution from mode 5 from the gray fit. The small difference between blue and gray lines  
 60 indicates the goodness of the fit.

61  
 62

63 General Comments: The paper Trueblood et al. 2020 is a nice study which considers INP data from  
64 oligotrophic/Mediterranean waters and shows that eutrophic parameterisations (W15 and MC18)  
65 result in over-prediction. The occurrence of a dust deposition event over the measurement periods, in  
66 conjunction with measurements from the SML, SSW, and SSA, makes for very interesting reading,  
67 although it is a shame that the dataset ends before INPSSA concentrations reached a clear maximum.  
68 However, this brings up the question can the two-component temperature dependent parameterisation  
69 from this study be relevant to much larger bodies of water? I am happy that the authors themselves  
70 addressed this in the need for future work relating INPSSA to POC and NCBL measurements in the  
71 Southern Ocean. However, the difficulty in choosing POC and NCBL in relationship to INP is that all  
72 variables must be directly measured.

73 We now propose a new parameterization based on OC and WIOC in SSA, which is more easily  
74 measurable or predictable.

75 The authors give no indication how to apply this parameterisation in a global model.

76 POC classes can be retrieved from satellite data (Rasse et al., 2017) or from Biogeochemical models  
77 such as PISCES (Aumont et al., 2015). SSA OC and WIOC characteristics can be taken from existing  
78 parameterizations and observations (Albert et al., 2010). This information is now added to line 528 of  
79 the manuscript.

80

81 The largest problem with the current study is that no uncertainties or error in the INP measurements  
82 (or biological measurements for that matter) are shown or discussed. This paper should not be  
83 published without the addition or evaluation of the inherent errors and uncertainties in the  
84 measurements themselves and the application of the measurements to creating a parameterisation.

85 As mentioned in the initial comment above, we have included error bars for particle size and surface  
86 area distributions. We have also included error bars for data from the DFPC and LINDA instruments.  
87 See relevant sections below for details and Figure 1 on line 180, Figure 2 on line 203, and Figure 6 on  
88 line 305 of the main text.

89 Also, the authors have not convincingly shown that the temperature dependent parameterisations are  
90 necessary to model INP concentrations, although they have shown that oligotrophic waters may need  
91 different parameterisations to eutrophic waters.

92 To ensure selection of the model that best fits the data, we formulated various  
93 parameterizations consisting of different time periods, features, and number of components for  
94 temperature ranges. Predictor features were chosen based upon their correlation with INP  
95 concentrations as described in the previous section. Single component parameterizations in which INP  
96 across all three temperatures were linked with the same features were compared with two-component  
97 parameterizations in which INP were split into warm and cold categories, each having their own  
98 predictor features. Finally, we developed and compared altered versions of the W15 and MC18  
99 models to account for the oligotrophic seawater of the Mediterranean Sea, as the existing models were  
100 formulated from observations of eutrophic waters. Each parameterization was recalculated using data  
101 across all days of the cruise as well as for only days before the dust deposition event in order to  
102 determine the impact of the dust event on the ability to predict INP. The complete set of  
103 parameterizations and their associated fit metrics ( $R^2$  and  $R_{adj.}^2$ ) are given in Table R2.

104 Figure R4a shows observed vs predicted  $INP_{SSA}$  for the W15 model, while Figure R4b shows  
105 the same but using the MC18 parameterization. Similar to our results for seawater INP, a large  
106 overprediction is found relative to our observations when using W15. Figure R4b shows that while  
107 MC18 is a slight improvement over the W15 approach, it still overpredicts INP by two orders of

118 magnitude. We also present re-calculated best-fit-lines to data using the same features as in W15 and  
 119 MC18 (i.e., OC and SSA surface area) in order to account for possible changes due to the oligotrophic  
 120 nature of the Mediterranean Sea. We term these two parameterizations the altered Wilson fit for  
 121 oligotrophy, which is given by:

$$\frac{INP}{m^3} = \exp(-7.332 - (0.2989 * T) + (0.3792 * OC_{SSA}))$$

122 and the altered McCluskey fit for oligotrophy, given as:

$$\frac{INP}{\mu m^2} = \exp(-26.57 - (0.2782 * T))$$

123 The results for these fits are shown in Figure R5a,b alongside the results of the original W15 and  
 124 MC18 parameterizations. Both altered models offer improvements over the original  
 125 parameterizations. The adjusted  $R^2$  of the altered Wilson fit for oligotrophy on log-transformed INP  
 126 abundance was  $R_{adj}^2=0.59$  and was  $R_{adj}^2=0.32$  for the altered McCluskey fit for oligotrophy.  
 127 Interestingly, the adjusted Wilson fit for oligotrophy performs better than the adjust McCluskey fit for  
 128 oligotrophy, which is the opposite of what was found when comparing the original models.

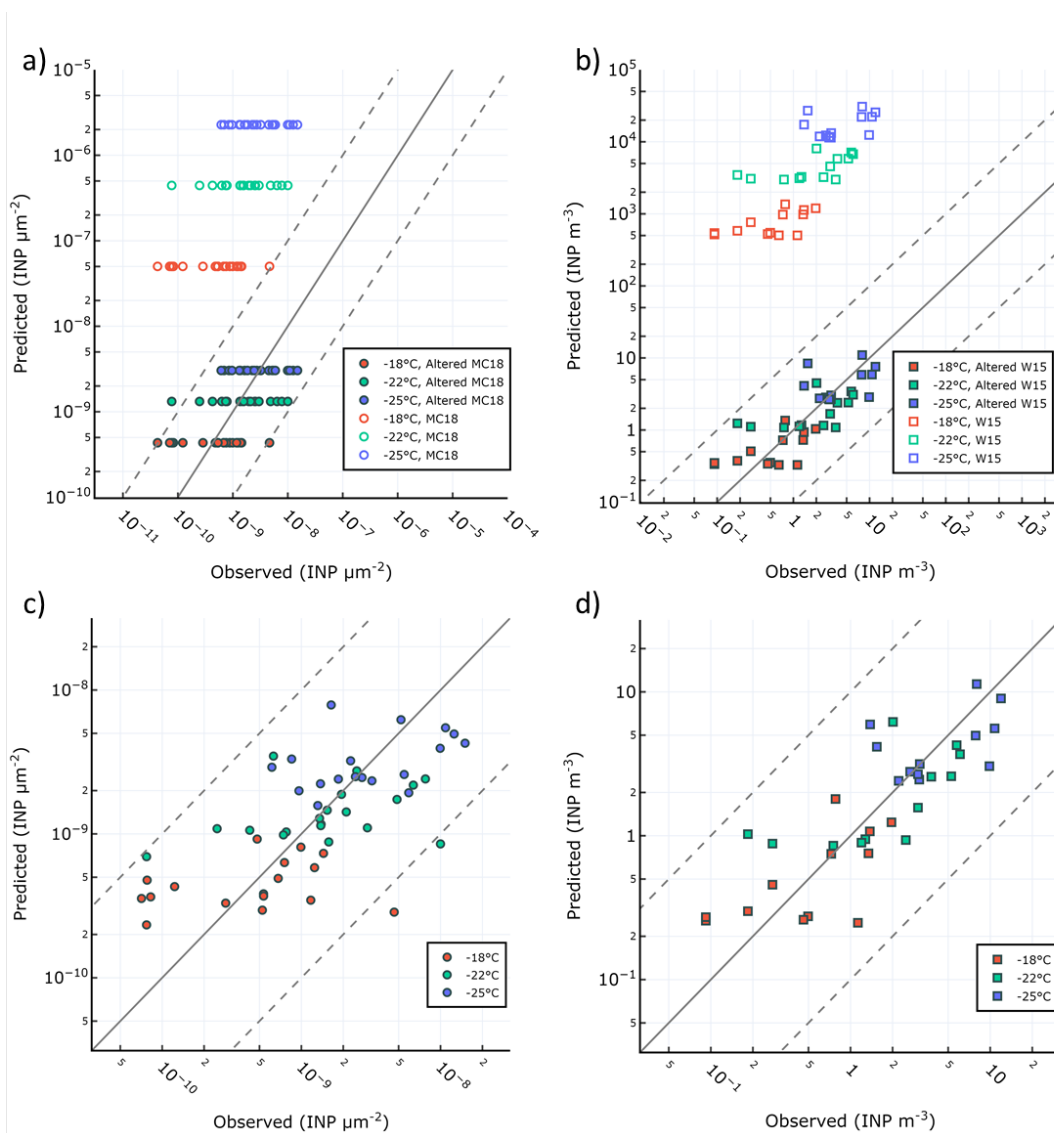

119 **Figure R54** Different parameterizations for prediction of INP in SSA. a) W15 and refit of same method using  
 120 PEACETIME observations b) MK18 and refit of same method using PEACETIME observations c) single-component  
 121 parameterization for INP/ $\mu m^2$  SSA surface area where INP at all temperatures are related to  $POC_{SSW}$  d) two-  
 122 component parameterization for INP/ $m^3$  where INP  $\geq -22^\circ C$  are related to OC and INP  $< -22^\circ C$  are related to WIOC.

123 We also tried a range of novel parameterizations based on the observed correlations between  
 124  $INP_{SSA}$  with seawater and SSA properties. Below we describe two parameterizations which offered  
 125 good fits to the data. The single-component parameterization assumes the abundance of INP per unit  
 126 surface area of total SSA at each temperature can be predicted from  $POC_{SSW}$  concentrations:

$$\frac{INP}{\mu m^2} = \exp(-28.5324 - (0.2729 * T) + (0.0361 * POC_{SSW}))$$

127 The second parameterization separates INP into warm and cold classes, where warm INP ( $\geq$ -  
 128  $22^\circ C$ ) are related to SSA OC and cold INP ( $<-22^\circ C$ ) are related to the concentration of SSA WIOC.  
 129 This two-component parameterization predicts the concentration of  $INP/m^3$  through the following

$$\frac{INP_{T \geq -22^\circ C}}{m^3} = \exp(-7.9857 - (0.3178 * T) + (0.4643 * OC_{SSA}))$$

$$\frac{INP_{T < -22^\circ C}}{m^3} = \exp(-6.6606 - (0.2712 * T) + (0.5755 * WIOC_{SSA}))$$

130 equations:

131 Figure R4c,d shows the results of our single-component model using  $POC_{SSW}$  and the two-part model  
 132 which uses SSA WIOC and OC and considers the separate temperature classes of INP. The adjusted  
 133  $R^2$  for each model on the log-transformed INP abundance were  $R_{adj}^2=0.404$  for the single component  
 134 model using  $POC_{SSW}$  and  $R_{adj}^2=0.60$  for the two-component model using OC and WIOC. This result  
 135 reveals that they both fit the observations better than the altered McCluskey parameterization for  
 136 oligotrophy, while the two-component method performs as well as the altered Wilson  
 137 parameterization. Each parameterization's fit to the data is improved when considering pre-dust days  
 138 only ( $R_{adj}^2=0.63$  for the two-component parameterization and  $R_{adj}^2=0.57$  for the single-component  
 139 parameterization). The improvement is more pronounced for the single-component parameterization  
 140 using  $POC_{SSW}$ , further pointing to the fact that such dust deposition events can alter the INP properties  
 141 of surface waters and the subsequent SSA, either through

142 .

143 **Table R2.** Summary of tested parameterizations to the PEACETIME dataset.

| Model Name          | INP Units     | Days     | # Cat. | Features        | Warm Features | Cold Features    | $R^2$ | $R_{adj}^2$ |
|---------------------|---------------|----------|--------|-----------------|---------------|------------------|-------|-------------|
| PD-2TC_OC_WIOC      | $INP/m^3$     | Pre-Dust | 2      |                 | $OC_{SSA}$    | WIOC             | 0.66  | 0.63        |
| PD-1TC_OC           | $INP/m^3$     | Pre-Dust | 1      | $OC_{SSA}$      |               |                  | 0.63  | 0.61        |
| PD-1TC_WSOC_WIOC    | $INP/m^3$     | Pre-Dust | 1      | WSOC, WIOC      |               |                  | 0.64  | 0.60        |
| AD-2TC_OC_WIOC      | $INP/m^3$     | All Days | 2      |                 | $OC_{SSA}$    | WIOC             | 0.63  | 0.60        |
| AD-1TC_OC           | $INP/m^3$     | All Days | 1      | $OC_{SSA}$      |               |                  | 0.61  | 0.59        |
| PD-2TC_POC_PHYTO-L  | $INP/\mu m^2$ | Pre-Dust | 2      |                 | $POC_{SSW}$   | Micro-NCBL       | 0.62  | 0.59        |
| AD-1TC_WSOC_WIOC    | $INP/m^3$     | All Days | 1      | WSOC, WIOC      |               |                  | 0.62  | 0.58        |
| PD-1TC_POC          | $INP/\mu m^2$ | Pre-Dust | 1      | POC             |               |                  | 0.59  | 0.57        |
| PD-1TC_POC_PHYTO-L  | $INP/\mu m^2$ | Pre-Dust | 1      | POC, Micro-NCBL |               |                  | 0.58  | 0.53        |
| PD-2TC_WSOC_WIOC    | $INP/m^3$     | Pre-Dust | 2      |                 | WSOC          | WIOC             | 0.53  | 0.49        |
| AD-2TC_WSOC_WIOC    | $INP/m^3$     | All Days | 2      |                 | WSOC          | WIOC             | 0.45  | 0.41        |
| AD-1TC_POC          | $INP/\mu m^2$ | All Days | 1      | $POC_{SSW}$     |               |                  | 0.43  | 0.40        |
| AD-2TC_POC_PHYTO-L  | $INP/\mu m^2$ | All Days | 2      |                 | $POC_{SSW}$   | Micro-NCBL       | 0.43  | 0.39        |
| AD-2TC_POC_PHYTO-LM | $INP/\mu m^2$ | All Days | 2      |                 | $POC_{SSW}$   | Micro-,Nano-NCBL | 0.43  | 0.38        |
| AD-1TC_T            | $INP/\mu m^2$ | All Days | 1      | Temperature     |               |                  | 0.33  | 0.32        |

144 We have added this discussion to line 411 of the manuscript.

145

146 A question also arises of whether INPSSA increases after the dust event are really to do with the dust  
147 event or not? INPSSA did not seem to be very connected with SML conditions (which surprised the  
148 authors and may therefore necessitate more attention).

149 **A more in depth discussion of the relationship between INP concentrations and the dust event has  
150 been added to the manuscript. See line 264 of the main text.**

151 Lastly, throughout the text, Figure and Table descriptions are kept too short and often do not fully  
152 describe what is shown.

153 **We have corrected the captions related to figures and tables. Details are seen in the relevant sections  
154 below.**

155 Specific Comments: Temperature nomenclature (TM) varies throughout the text, sometimes for  
156 example as -15C or -15 C. Please keep consistency and it is suggested to use the proper format of e.g.  
157 -15°C. All figures appear blurry, this should be corrected.

158 **We have corrected this throughout the text.**

159 Line 102 – SSW properties were obtained from two depths 20 cm and 5 m, why this is done at two  
160 depths is never explained. It is important as POC is measured at 5 m depth while SML and 20 m depth  
161 SSW samples were measured simultaneously and both calculated NCBL.

162 **This question is linked to the question regarding Line 204 (see below). SSW properties were measured  
163 at two depths because multiple analysis methods were available. The first method was an underway  
164 system that continuously monitored 5 m water with a high time resolution. The second method was a  
165 workboat which was used to collect discrete samples both the SML and the underlying seawater (at 20  
166 cm, not 20 m). By measuring SSW properties from multiple methods (i.e., the workboat and underway),  
167 we were able to compare results from the two and be sure of the results. Figure R5 below shows that  
168 there was reasonable agreement between the two SSW sampling methods. Larger phytoplankton species**

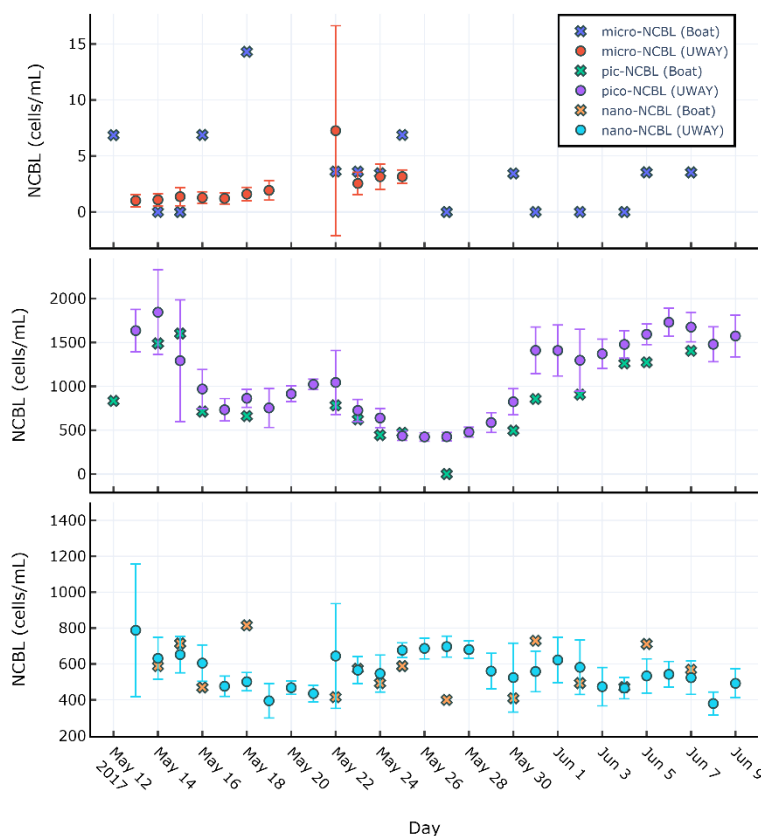



169 (i.e., microphytoplankton) showed greater variability between the two methods than did smaller species  
170 (i.e., picophytoplankton), with workboat measured microphytoplankton values at times higher than  
171 those measured from the underway. Additionally, after May 25, the underway system stopped  
172 monitoring microphytoplankton.

173 **Figure R5. Daily average of continuous NCBL measurements from the underway (UWAY)**  
174 **system, where error bars represent standard deviation compared with discrete daily samples**  
175 **from the workboat.**

176 Line 110 – Why is there a specific empirical relationship for PEACETIME? Will this affect other  
177 estimations of POC used for the parameterization?

178 POC was determined both continuously using optical methods and on discrete samples via high  
179 performance liquid chromatography. The discrete samples were then used to calibrate the optical  
180 determination of POC, as optical proxies have been found to vary from one region to another (Cetinić  
181 et al., 2012).

182 Line 126 – methodology should be described in brief, or else simply cited if it is the only established  
183 measurement practice.

184 We make reference to the method as described in the literature (Tovar-Sanchez 2019), on line 124 of  
185 the main manuscript.

186 Line 140 – calculation should be described in brief. What are the associated errors/uncertainties of  
187 this methodology using LINDA?

188 The calculation for INP from the LINDA instrument follows Stopelli (2014) which was originally  
189 formulated by Vali (1971):

$$190 \quad \frac{INP}{volume} = \frac{\ln(N_{total}) - \ln(N_{unfrozen})}{V_{tube}}$$

191 where  $N_{total}$  is the total number of tubes,  $N_{unfrozen}$  the total number of unfrozen tubes, and  $V_{tube}$  the  
192 volume of sample in each tube. The number of unfrozen tubes is calculated by first blank correcting  
193 the number of frozen tubes, and then subtracting that value from the total number of tubes.

194 We calculate uncertainty as the binomial proportion confidence interval (95%) using the Wilson score  
195 interval.

196 This information has been added to the main text on line 134.

197 Line 153 – You talk about bin size or 100-500 nm, but what is this? Is it the dry particle (electrical?)  
198 mobility diameter? This must be stated explicitly.

199 For particle size distributions, we used a custom-made system referred to as Scanotron, which consists  
200 of a DMPS and a size segregated cloud condensation nuclei counter system in parallel. The Scanotron  
201 measures dry particle electrical mobility diameter. Data is inverted with the szdist algorithm  
202 developed at LaMP and available online (<https://hal.archives-ouvertes.fr/hal-01883795>). The  
203 inversion assumes a theoretical transfer function for the differential mobility analyzer (DMA)  
204 and considers the condensation particle counter (CPC) efficiency and the charge equilibrium state. It  
205 also includes multiple charge correction and accounts for diffusion losses in the instrument.  
206 Data quality is regularly checked during inter-calibration procedures and inter-comparison  
207 workshops, initially conducted in the frame of the EUSAAR 210 project (European Supersites  
208 for Atmospheric Research) and since 2011 within the ACTRIS project (Wiedensohler et al.,  
209 2012).

210 We have added the information regarding particle diameter to line 175 of the main text.

211 Line 161-164. Confusing description of how measurement of WSOC was measured vs how TOC was  
212 measured. Then how was WIOC measured?

213 WSOC was measured after water extraction using a high-temperature catalytic oxidation instrument  
214 (Shimadzu; TOC 5000 A). TOC was measured using a Multi N/C 2100 elemental analyzer (Analytik  
215 Jena, Germany) with a furnace solids module. The analysis was performed on an 8 mm diameter filter  
216 punch, pre-treated with 40  $\mu$ L of H<sub>3</sub>PO<sub>4</sub> (20% v/v) to remove contributions from inorganic carbon.  
217 WIOC was determined as the difference between TOC and WSOC.

218 We have added this to line 155 of the main text.

219 Line 166-175. It seems that no measurements of ambient INP were taken. This seems concerning as  
220 often tank and ambient measurements do not always compare well to one another. Do you have  
221 evidence that the plunging jet SSA measurements were similar to that of the ambient SSA over the  
222 Mediterranean?

223 Our goal in this experiment is to determine the contribution of INP to sea spray aerosols. As ambient  
224 sources are expected to contain additional aerosols beyond sea spray, our bubbling setup was  
225 necessary in order to restrict our analysis. The characteristics of the setup were selected to mimic  
226 Fuentes et al. (2010). These parameters (water flow rates, plunging water depth, etc.) have been  
227 shown to mimic well nascent SSA. Using this setup, our group has previously effectively mimicked  
228 the SSA size distribution of nascent SSA (Schwier et al., 2015; 2017). Furthermore, our distribution  
229 matches well with modes 1-4 of Ovadnevaite et al. (2014) (see initial comments at top of this file).

230 We have added this information to line 142 of the main text.

231 Line 166-175. What are the associated errors/uncertainties of this methodology using DFPC?

232 During an intercomparison study of the DFPC with other INP measurement systems (DeMott et al.,  
233 2018) the DFPC was found to have uncertainties for temperature and water supersaturation of about  
234 0.1 °C and 0.02%, respectively, leading to an overall INP concentration uncertainty of  $\pm$ 30%.

235 We have thus added 30% error bars on the observations of DFPC measured INP (Figure 1B on line  
236 189 in the main text). We also now note this uncertainty in line 172 of the main text. For greater  
237 explanation of the DFPC as well as how a description of its use in other studies, see our response to  
238 reviewer 2.

239 Line 178 – 183. How are INP from SSW measured (I assume it is LINDA – but this is not included in  
240 your methodology)? Which SSW measurement is tested for INP?

241 Correct, it is LINDA. The test is for SSW water from the workboat. We now make note of this in line  
242 129 of the main text.

243 Line 191 – 192. The use of the term ‘peak’ here is a bit confusing in two ways. Purely graphically it is  
244 true that INPSSA,-25C peaked on May 12, however, the implication that it is truly peaking is false as  
245 this is the first measurement it could have been higher before measurements commenced. Has  
246 contamination of the plunger tank system been ruled out as it is by far the greatest disparity between  
247 different temperatures for INPSSA?

248 Data point on May 13 (erroneously reported as May 12) has been corrected. See initial comment on  
249 changes to SSA surface area and averaging intervals. By correcting sampling intervals, the peak on  
250 May 13 has been corrected. See Figure 2b in the text on line 189.

251 Regarding potential contamination: the plunging jet system was cleaned at the same time as the ship's  
252 underway system and the comparison of the biological measurements from the underway seawater  
253 system show agreement with workboat samplings, indicating no contamination across the voyage.  
254 The plunging jet systems were additionally cleaned every day for being used in discrete seawater  
255 generation experiments. Generated SSA concentrations were found correlated to the  
256 nanophytoplankton cell number concentration measured online from the underway seawater system  
257 (Sellegrì et al., 2020 in review) indicating no contamination of the plunging jet system itself.

258 We have also altered the text describing the INP timeseries starting on line 175.

259 Line 196. Again the use of the word peak is a bit misleading as measurements ended before the true  
260 peak could be observed. In this case can you really comment on the time difference between one peak  
261 in SML and SSA?

262 See response to the comment above on line 191.

263 Line 204. Were there any differences in cell counts between SSW at 5 m or 20 cm depth?

264 Overall, the agreement was reasonable between SSW at 5 m and 20 cm depth. See response above to  
265 comment on line 143 of this file and associated Figure R5 for a comparison of cell counts from  
266 underway vs workboat.

267 Line 206-207. Are these the ranges associated with Pujo-Pay et al. 2011, or the ranges for this study?  
268 If the latter than perhaps give the expected range as well.

269 These are ranges associated with this study. Pujo-Pay gives range of 45.3-72.4  $\mu\text{M}$  for DOC and 0.80-  
270 8.70 for POC. More specifically, Western Basin DOC ranges between 45.3-69.4 with mean of 58.7  
271 and sigma of 7.4. Eastern Basin ranges between 49.4-72.4 with average of 61.5 and sigma of 5.9.  
272 Western Basin POC ranges between 1.45-8.70 with mean of 4.31 and sigma of 1.73 while Eastern  
273 Basin POC ranges between 0.80-5.41 with mean of 3.08 and sigma of 0.90.

274 We have added the following:

275 *Observed DOC and POC values ranged between 700-900  $\mu\text{gC/L}$  and POC between 42-80  $\mu\text{gC/L}$  and  
276 were within the range of expected values for the oligotrophic Mediterranean (540–860  $\mu\text{gC/L}$  for  
277 DOC and 9.6-104  $\mu\text{gC/L}$  for POC)(Pujo-Pay et al., 2011).*

278 Line 209. How are you calculating enrichment factor? It is good to state as sometimes confusion  
279 arises.

280 Enrichment factor is calculated as the ratio of SML to SSW:

281 
$$EF = \frac{SML}{SSW}$$

282 We have added this to line 129 of the main text.

283 Line 236-240. This paragraph feels like it is out of place as a discussion paragraph crammed between  
284 the synopsis of the results in the same Figure. It does not add much to the discussion. What do these  
285 two studies mean for your results? If anything they imply that you must compare INPSSA to SSA  
286 bacterial abundance.

287 See response to the comment below.

288 Line 250. DOC EF is positively correlated with INPSML,-15C, and you state this is due to the dust  
289 event, and in the next statement say that the fraction DOC enriched in the SML during the dust event  
290 has specific IN properties. It seems possible that the DOC came from non-marine originating bacteria

291 and that the deposition event also deposited terrestrial DOC which is the origin of increased IN  
292 ability. Or more so, could the correlation be coincidental with another correlating factors from the  
293 dust event (i.e. Fe)? No indication is given of why the authors believe it to be ‘likely connected to the  
294 CSP abundance, albeit not to the TEP’, which if given may add value to the statement.

295 We have altered the text to the following, which can be found on line 275:

296 *“Figure 4 shows scatterplots of statistically significant relationships between  $INP_{SML,-15C}$*   
297 *concentrations and various SML properties.  $INP_{SML,-15C}$  were most strongly positively correlated with*  
298 *dissolved iron ( $r=0.99$ ), TEP EF ( $r=0.95$ ), and bacteria EF ( $r=0.93$ ). However, these relationships*  
299 *are skewed by the outlier due to the drastic increase in iron observed on June 4 (Figure S2a) from the*  
300 *dust deposition event, as described previously. It is difficult to segregate between the dust and*  
301 *biological impact on the  $INP_{SML,-15C}$ , as dust is known to have good INP properties while being*  
302 *capable of fertilizing the surface ocean with dissolved iron, leading to concomitant increases in*  
303 *biological activity. It is also possible that the dust deposition led to increased abundance of terrestrial*  
304 *OC, which would exhibit different INP activity. When considering days before the dust event,  $INP_{SML,-}$*   
305  *$15C$  is only significantly correlated with dissolved iron ( $r=0.91$ ) and TOC in the SML ( $r=-0.93$ ). We*  
306 *note that while no longer statistically significant for pre-dust days, moderate correlations were still*  
307 *observed between  $INP_{SML,-15C}$  and total NCBL ( $r=0.48$ ), HNA bacteria ( $r=0.78$ ), and total bacteria*  
308 *( $r=0.64$ ). Previous reports examining the correlation between INP and microbial abundance have*  
309 *yielded mixed results. For example, a report of INP in Arctic SML and SSW found no statistically*  
310 *significant relationship between the temperature at which 10% of droplets had frozen and bacteria or*  
311 *phytoplankton abundances in bulk SSW and SML samples (Irish et al., 2017). However, recent*  
312 *mesocosm studies using nutrient-enriched seawater found that INP abundances between  $-15^{\circ}C$  and -*  
313  *$25^{\circ}C$  in the aerosol phase were positively correlated with aerosolized bacterial abundance*  
314 *(McCluskey et al., 2017). “*

315 Line 291-293. What are the total particle counts referred to in Line 292? How are they measured and  
316 how do they match well with SSA counts in the range? In terms of SSA surface area: (1) how was  
317 SSA calculated from  $D_p$ ? (2) SSA have two noticeable modes larger than 500 nm, one is a submicron  
318 mode and the other is the jet-drop mode which are found to have mean dry mobility diameters near at  
319 0.83 (Ovadnevaite et al. 2014) and  $\sim 2 \mu m$  (Wang et al. 2017, Lewis & Schwartz 2004), respectively.  
320 According to Figure S3, most of the surface area distributions have already peaked by 0.5  $\mu m$  particle  
321 diameter (with the possible exception of 2017-05-17), yet a significant portion of surface area for  
322 particles with  $D_p > 0.5 \mu m$  seems to be lost. It seems an overstatement to say ‘most of the surface area  
323 of sea spray is comprised between this size range’. Ovadnevaite, J., Manders, A., de Leeuw, G.,  
324 Ceburnis, D., Monahan, C., Partanen, A. I., Korhonen, H., and O’Dowd, C. D.: A sea spray aerosol  
325 flux parameterization encapsulating wave state, Atmos. Chem. Phys., 14, 1837-1852, 10.5194/acp-14-  
326 1837-2014, 2014. Wang, X., Deane, G. B., Moore, K. A., Ryder, O. S., Stokes, M. D., Beall, C. M.,  
327 Collins, D. B., Santander, M. V., Burrows, S. M., Sultana, C. M., and Prather, K. A.: The role of jet  
328 and film drops in controlling the mixing state of submicron sea spray aerosol particles, Proceedings of  
329 the National Academy of Sciences, 114, 6978-6983, 10.1073/pnas.1702420114, 2017. Lewis, E. R.,  
330 and Schwartz, S. E.: Sea Salt Aerosol Production: Mechanisms, Methods, Measurements and Models-  
331 A Critical Review, American Geophysical Union, 2004.

332 We refer to the initial opening comment as our response to the first portions of this comment. We do  
333 not compare our particle size distribution to Wang et al. (2017) as the size distributions shown in their  
334 paper are created from electrolysis bubbles, which was used to investigate the role of jet drops in  
335 submicron aerosol formation. As the electrolysis bubbler created hydrogen bubbles with size less than  
336 100  $\mu m$  and a mean radius between 20-40  $\mu m$ , no film drops would be expected to contribute to these  
337 SSA since only bubbles of radius greater than 500  $\mu m$  create film drops. This method would therefore  
338 not be expected to accurately represent SSA. Indeed, the authors state “It is important to note that the

339 nucleation bubbler is an artificial source of jet drops that was convenient to unambiguously illustrate  
340 the differences in electrical mobility between jet and film drops, but is not representative of wave  
341 breaking.” Wang et al. (2017) does also show a particle size distribution for SSA generated using a  
342 plunging waterfall in a marine aerosol reference tank, but this is only for particles with diameter less  
343 than 1  $\mu\text{m}$  and thus cannot be used as a reference for supermicron particle counts.

344 Line 313. What is the difference between SSA OC and TOC here? How is OC calculated from the  
345 SSA?

346 Here, SSA OC is defined as the organic carbon content found within the aerosol phase for PM1  
347 particles. Earlier in the manuscript this was defined as TOC, and so we will change this to make it  
348 more clear. Section 2.3.2 describes how TOC was calculated by acidifying filter punches to remove  
349 inorganic carbon, leaving only TOC.

350 Line 326/327. It would be good to state the relevant conclusions of Freney et al. 2020.

351 We have added the following to line 406 of the main text:

352 *“A separate manuscript discusses the trend and controls on SSA chemical composition, linking the*  
353 *different classes of organic carbon in submicron SSA to seawater chemical and biological properties*  
354 *(Freney et al., 2020). In this work, OMSS was linked to  $\text{POC}_{\text{SSW}}$  and the coccolithophores cell*  
355 *abundance. In light of this and given the correlation of  $\text{INP}_{\text{SSA},-25\text{C}}$  with seawater microbial abundance*  
356 *and with SSA OMSS and WIOC, it seems likely that  $\text{INP}_{\text{SSA}}$  at this temperature are related to the*  
357 *exudates of phytoplankton which are concentrated at the SML and then emitted into the SSA as*  
358 *WIOC.”*

359 Line 368. How are you calculating OMSS? Why is this in agreement with Cochran et al. 2017?

360 OMSS is calculated as the fraction of OM/(OM+SeaSalt), where SeaSalt is the sum of  $\text{SO}_4^{2-}$ ,  $\text{NO}_3^-$ ,  
361  $\text{NH}_4^+$ ,  $\text{Na}^+$ ,  $\text{Cl}^-$ ,  $\text{K}^+$ ,  $\text{Mg}^{2+}$ ,  $\text{Ca}^{2+}$  as determined using ICP-MS and OM is the sum of WSOM and  
362 WIOM, which are each calculated as  $\text{WSOM} = \text{WSOC} \times 1.8$  and  $\text{WIOM} = \text{WIOC} \times 1.4$  (where  
363 WIOC and WSOC are calculated using the method described on line 164 of this text). We have added  
364 this description to line 163 of the text.

365 Furthermore, we have altered the text on line 400 of the manuscript to the following:

366 *“Table 4 and Figure 7 shows the significant correlations between  $\text{INP}_{\text{SSA}}$  and SSA properties. A positive*  
367 *correlation exists between  $\text{INP}_{\text{SSA},-18\text{C}}$  and SSA organic carbon (OC) as well as the ratio of SSA water-soluble*  
368 *organic carbon to organic carbon ( $\text{WSOC}/\text{OC}$ ). The correlation between  $\text{WSOC}/\text{OC}$  and  $\text{INP}_{\text{SSA},-18\text{C}}$  makes*  
369 *sense given the finding that  $\text{INP}_{\text{SSA},-18\text{C}}$  was correlated with  $\text{POC}_{\text{SSW}}$ , as a higher  $\text{WSOC}/\text{OC}$  value would suggest*  
370 *a higher fraction of soluble organics which would be expected to transfer to the atmosphere from the bulk SSW*  
371 *rather than the SML due to their high solubility.  $\text{INP}_{\text{SSA},-25\text{C}}$  had a significant correlation with WIOC and OMSS.*  
372 *We note that  $\text{INP}_{\text{SSA},-25\text{C}}$  was also found to be correlated with various microbes in the SSW, specifically*  
373 **Prochlorococcus*, coccolithophores, nano- and micro-NCBL (previous section). Phytoplankton are known for*  
374 *their ability to produce extracellular polymeric substances (Thornton, 2014), and a previous mesocosm*  
375 *experiment showed microbially-derived long-chain fatty acids were efficiently ejected from the seawater as SSA,*  
376 *increasing the fraction of highly-aliphatic, WIOC (Cochran et al., 2017). A separate manuscript discusses the*  
377 *trend and controls on SSA chemical composition, linking the different classes of organic carbon in submicron*  
378 *SSA to seawater chemical and biological properties (Freney et al., 2020). In this work, OMSS was linked to*  
379  *$\text{POC}_{\text{SSW}}$  and the coccolithophores cell abundance. In light of this and given the correlation of  $\text{INP}_{\text{SSA},-25\text{C}}$*   
380 *with seawater microbial abundance and with SSA OMSS and WIOC, it seems likely that  $\text{INP}_{\text{SSA}}$  at this*  
381 *temperature are related to the exudates of phytoplankton which are concentrated at the SML and then emitted*  
382 *into the SSA as WIOC.”*

383 Line 413. It is stated that ‘. . .the INP concentrations measured in the SSW are in line with the INP  
384 measured in the SML. . .’. There is only one comparison of INP shown of the two (figure 2a) and only

385 one temperature is shown for the SSW. Is there further evidence to back this statement? Indicate what  
386 evidence is referred to in the text.

387 **This statement was vague and has been removed.**

388 Table 1 – Description of table needs to state what p, R(R2) and n are. Is the p value of NCBL EF  
389 0.78? This looks like a typo. Review the rest of the table to double check for other typographical  
390 issues. Why does it say CSPabundance, when in there is no explanation of the difference between  
391 CSP and CSPabundance?

392 **All tables and scatter plots in the manuscript have been altered to account for these requests. We have**  
393 **recalculated all correlations after calculating adjusted averaged underway values to better line up with**  
394 **DFPC filter sampling time and adjusted IN<sub>SSA</sub> normalized by particle surface area values (explained**  
395 **above). This did not impact the INP<sub>SML</sub> correlations with seawater properties, as daily averages were**  
396 **retained. Please see Table 1 on line 262, Table 2 on line 351, Table 3 on line 360, and Table 4 on line**  
397 **384.**

398 Table 2. Description of table needs to state what p, R(R2) and n are. The table is stretched over a page  
399 break. This should be corrected to be on one page. Change POC to POCSSW.

400 **Please see comment above and Table 2 on line 351.**

401 Table 3. Description of table needs to state what p, R(R2) and n are.

402 **See comment above and Table 3 on line 360.**

403 Figure 1. The image is blurry. The points indicated on the map are names with abbreviations that are  
404 never explained nor referred to in the text. If these refer to the dates mentioned in other graphs, this  
405 should be made clear. If not, then why are they there?

406 **We have removed this figure from the manuscript.**

407 Figure 2. Why is there no uncertainty associated with each measurement? INP measurements have  
408 some of the largest uncertainties in aerosol science, this can't be neglected. How do you explain why  
409 INPSSA,-25C and INPSSA,-22C are sometimes anti-correlated and sometimes not? Some other  
410 minor corrections are needed. This graph is blurry and should be higher resolution. It would be nice to  
411 have different keys for a) and b). The y-axis in a) should be written scientifically – i.e. either 10,000  
412 or 1x10<sup>4</sup>. It is difficult to differentiate the colours, effort should be taken to use different markers. The  
413 bottom access should probably be the 'Date' not 'Day Number' (see same issue in other graphs).

414 **See responses above. We have updated the figure accordingly, which can be seen on line 192 of the**  
415 **manuscript.**

416 Figure 3. This figure is also blurry with no error/uncertainty on the measurements shown.

417 **We have updated this chart, please see Figure 4 on line 275.**

418 Figure 4. Y-axis scale is difficult to interpret, should be written for example 108 not 108. On the x-  
419 axis the authors might consider writing Temperature (°C) rather than (C). Again error/uncertainties  
420 should be shown, or else noted that the error bars are not larger than the data points. The description  
421 of Figure 4 is on a different page than the figure, this should be corrected. It is difficult to tell  
422 day=2017-05-24 from day=2017-06-06. The authors could probably omit the 'day=' in the key and  
423 make the text larger.

424 **Error bars have been added to account for INP counting errors. We included all temperature rather**  
425 **than single degree averaged values. Please see Figure 6 on line 319.**

426 Figure 5. Description does not mention INP normalised to SSA. Why use /cm<sup>3</sup> rather than /nm<sup>2</sup>  
427 which is what the surface area is shown in in Figure S3? When you normalise INP to SSA, should it  
428 not still be in term of (/m<sup>3</sup> of air  $\hat{A}$  °u SSA cm<sup>2</sup>)? Top left panel, should read ‘3x10<sup>-4</sup>’ not ‘3x10<sup>-4</sup>’.

429 **We have updated the scatterplot figures based on this and the requests below. Please see Figures 8, 9,**  
430 **and 10 on lines 355, 375, and 410 of the main text.**

431 Figure 6. Description should be below figure, and should include some more details of the graph. The  
432 figure is blurry, and need to be corrected. OMSS not explained.

433 **This figure has been moved to the SI and can be found on line 27 of the SI.**

434 Figure 7. Description should mention only significant correlations shown. Text should not state that  
435 these panels are a matrix. The scatter plots are blurry and should be corrected to higher resolution.  
436 The authors may choose to add r-values to each panel to make it easier for readers to study the results.

437 **See comments above.**

438 Figure 8. Graph should be made larger and enhanced to be less blurry. Y-axis scale is difficult to  
439 interpret, should be written for example 101 not 101. It is difficult to read the axes. Your 3 panel axes  
440 seem to be in different units, some per L and some per m<sup>3</sup>. These are all SSA INP so they should be  
441 terms of their atmospheric concentration. This should be explained in the description. Additionally, it  
442 seems clear from the graphs that while both the W15 and MC18 models over predict INP  
443 concentrations the over prediction is not really temperature dependent. The graph seems to show more  
444 of the difference between oligotrophic waters and eutrophic waters. How much does the authors’ own  
445 parameterizations differ if only the colder (eq. 2) or warmer (eq. 1) parameterization is applied to all  
446 the results? Are there any data of eutrophic waters which suggest a temperature dependence might  
447 improve the agreement?

448 **Please see response on line 81 of this file.**

449 Supplementary Info – consider adding a schematic of measurements taken from the tank.

450 Table S1. Usually tables come before Figures. Description of table needs to state what p, R(R<sup>2</sup>) and n  
451 are. Place a ‘0’ before all values in column p.

452 **This table has been removed.**

453 Figure S1. Where possible, missing data should be deleted rather than shown as a line jumping from  
454 the last measured point to the next. There should be graph panel specific keys as each factor is not  
455 shown on every graph. It would be nice if more detail could be given in the description of where/how  
456 these measurements were taken. A description of what POC or biovolume covers here could also be  
457 useful.

458 **Figure S1 has been updated and is found on line 11 of the SI.**

459 Figure S2. Grey outline squares around a) and b) are somewhat off centre and cut-off the a) and b). Fe  
460 axis should be shown on the same scale in a) and b). It would be nice to see INPSSA measurement  
461 overlaid in time with those SML and SSW conditions considered to be contributing most prominently  
462 to INPSSA concentrations.

463 Figure S3. It is nearly impossible to tell some of these ‘variable’ apart as the same color is used for  
464 multiple days. Please graph in such a way that the surface area spectrums can be identified for each  
465 variable. If they are daily averages than the stdev should also be graphed. Y-axis, change from  
466 ‘(nm<sup>2</sup>/(cm<sup>3</sup>))’ to ‘(nm<sup>2</sup>/cm<sup>3</sup>)’. The authors could probably omit the ‘variable=’ in the key. Also, it

467 is low resolution. What is a scanotron? Were these not measured by the DMPS as stated in the  
468 methodology?

469 **Please see Figure S3 of the supporting information on line 19.**

470 Figure S4. Color of 'variables' again overlap for multiple days. Please graph in such a way that the  
471 number size distribution spectrums can be identified for each variable. If they are daily averages than  
472 the stdev should also be graphed. The y-axis shows  $dN/d\log D_p$  in '(particles/(cm<sup>3</sup> nm))' the extra  
473 nm is likely a typo? It should be '(/cm<sup>3</sup>)'. The authors could probably omit the 'variable=' in the key.  
474 Also, the graph resolution is low. What is a scanotron? Were these not measured by the DMPS as  
475 stated in the methodology?

476 **See the answer regarding Line 153 for description of DMPS (i.e., scanotron). See Figure R1 of this**  
477 **text. This has been updated in the manuscript accordingly.**

478 Technical corrections:

479 **We have corrected all of the concerns listed below and they are highlighted in the manuscript.**

480 Line 22 – delete the 's' after INP, as INP is defined plural earlier.

481 Line 29 - delete the 's' after INP. This occurs many more times so check throughout the text.

482 Line 33 – delete extra space '...to SSW parameters (POCSSW. . .'. Add an 'and' or a ',' between  
483 '(POCSSW INPSSW,-16C)'.

484 Line 56 – delete ')((' between references and replace with ';'. Delete '- ' after SSA.

485 Line 62/63 – refer to study simply as 'Wilson et al. 2015 identified a temperature-dependent. . .'.  
486 Either delete the 's' from the end of the word entities or from concentrations.

487 Line 68 – TM (see specific comments).

488 Line 85 - delete the 's' after INP. Delete the 'the' before title of study. Here is it the title of the cruise  
489 or study? I suggest replace the word 'cruise' with 'study' and delete 'study' from the end.

490 Line 87 – add space, 'May 10 – June 10, 2017'. Line 88 – delete 'were'.

491 Line 92 – what is 'R/V'? Here 'Pourquoi Pas?' is written differently than later. Keep consistency.

492 Line 94 – replace 'fashion from 35° to 42° ' to 'fashion between 35° to 42° '.

493 Line 109 – HPLC acronym not explained.

494 Line 113 – FWS and SWS acronym not needed as never used again.

495 Line 124 – ICP-MS acronym not explained. Replace with full title as acronym not needed.

496 Line 130 – MQ acronym not explained. Replace with full title as acronym not needed.

497 Line 131 – add space between '0.5L'

498 Line 132 – HCL acronym not explained, although it is well known as Hydrochloric acid. Authors may  
499 choose to spell it out as it is not repeated.

500 Line 135 - add space, 'May 22 - June 7'.

501 Line 137 – TM (see specific comments).

502 Line 146 – change meter to 'm'



503 Line 147 – ACSM acronym not described. DMPS and CPC acronym used before description.

504 Line 153 – correct to '10-500 nm'.

505 Line 159 – MSA acronym not explained. Replace with full title as acronym not needed.

506 Line 160 – KOH acronym not explained. Replace with full title as acronym not needed.

507 Line 161 – WSOC acronym used for first time and is not defined. Line 166 – '24h' change to '24-  
508 hour' to keep consistency.

509 Line 167 – delete the 's' after INP, as INP is defined plural earlier.

510 Line 169 – change to '47 mm' with space.

511 Line 173 – TM (see specific comments). Add '. . .(for air temperatures of . . . -22.3 C, respectively)'.  
512 Line 175 – add 'INP/volume of air'

513 Line 181/182 – TM (see specific comments). June 4 not 4th.

514 Line 192 – use scientific notation for INP/m<sup>3</sup> (i.e. 1.47x10<sup>-2</sup> not 14.7x10<sup>-3</sup>).

515 Line 196 – the peak in INPSSA occurred three days after INPSML peaked, not one day. Unless the  
516 authors meant to suggest that INPSSA only saw an increase begin a full day after the INPSML peak?  
517 Line 200 – Delete '(SI)'.

518 Line 204/205 – keep same scientific notation for describing cells/mL.

519 Line 209 – add 'Enrichment factors (EF). . .'

520 Line 214 – delete 'next' (optional).

521 Line 220 – consider adding in '. . .positive or negative correlations. . .'

522 Line 254 – uppercase L for litre, such that 'TOC µgC/L'. Replace 'particulate organic carbon' with  
523 POC.

524 Line 255 – Replace 'dissolved organic carbon' with DOC.

525 Line 256 – Should be '(INP per gram of TOC)' not 'OC'. Is this cumulative INP as in W15, or is this  
526 INP/mL?

527 Line 282 – Do you mean '. . .between seawater OC' or 'TOC'?

528 Line 291 – add space between '500' and 'nm'.

529 Line 294 – Only normalised size distribution shown in Figure S4, not number concentration. Perhaps  
530 add it in the graph key? Replace 'dependence of' with 'dependence on'.

531 Line 298 – add space between '500' and 'nm'. Line 300 – add 'in' ahead of 'Table 2'.

532 Line 307 – Give correlation stats for INPSSW,-16C

533 Line 351 – replace 'the' with 'that'.

534 Line 353 – Replace 'At this C8 ACPD Interactive comment Printer-friendly version Discussion paper  
535 temperature, INPSSA' with just 'INPSSA,-25C. . .'

536 Line 361 – some overlap issue with graph and line numbering.

537 Line 362 – change 'R=.84' to 'R=0.84'. Check for other numbering mistakes throughout the text.

538 Line 380/381 – TM (see specific comments).

539 Line 392 & equations – Warm INP defined as  $\geq -24^{\circ}\text{C}$ , but in eq. (1) says  $-22$ . Also, in eq. (1) ‘POC’  
540 should be rewritten ‘POCSSW’ to keep clarity (unless authors want any POC to be used in which case  
541 more explanation should be given).

542 Line 393 – this entire line should come before eq. (1) and (2).

543 Line 425 –INPSWL? Change ‘INPSWL and INPSML’ to ‘INPSSW and INPSML’.

544 Line 430 – Is INPSSA measured at  $-16^{\circ}\text{C}$  or it  $-18^{\circ}\text{C}$ ? Leave and ‘and’ or ‘,’ between POC and INP.

545 Line 436 – ‘. . .seawater POC and SSW microbial abundance’ seems redundant or repetitive.

546 Line 446 – it is written here ‘RV’ but elsewhere ‘R/V’. ‘Pourquoi Pas ?’ is also written differently  
547 elsewhere. Please also note the supplement to this comment: [https://www.atmos-chem-phys-](https://www.atmos-chem-phys-discuss.net/acp-2020-487/acp-2020-487-RC1-supplement.pdf)  
548 [discuss.net/acp-2020-487/acp-2020-487-RC1-](https://www.atmos-chem-phys-discuss.net/acp-2020-487/acp-2020-487-RC1-supplement.pdf) supplement.pdf

549

550 Albert, M. F. M. A., Schaap, M., de Leeuw, G., and Bultjes, P. J. H.: Progress in the determination of  
551 the sea spray source function using satellite data, *Journal of Integrative Environmental Sciences*, 7,  
552 159-166, 10.1080/19438151003621466, 2010.

553 Aumont, O., Ethé, C., Tagliabue, A., Bopp, L., and Gehlen, M.: PISCES-v2: an ocean biogeochemical  
554 model for carbon and ecosystem studies, *Geosci. Model Dev.*, 8, 2465-2513, 10.5194/gmd-8-2465-  
555 2015, 2015.

556 Cetinić, I., Perry, M. J., Briggs, N. T., Kallin, E., D'Asaro, E. A., and Lee, C. M.: Particulate organic  
557 carbon and inherent optical properties during 2008 North Atlantic Bloom Experiment, *Journal of*  
558 *Geophysical Research: Oceans*, 117, 10.1029/2011JC007771, 2012.

559 DeMott, P. J., Möhler, O., Cziczo, D. J., Hiranuma, N., Petters, M. D., Petters, S. S., Belosi, F.,  
560 Bingemer, H. G., Brooks, S. D., Budke, C., Burkert-Kohn, M., Collier, K. N., Danielczok, A., Eppers, O.,  
561 Felgitsch, L., Garimella, S., Grothe, H., Herenz, P., Hill, T. C. J., Höhler, K., Kanji, Z. A., Kiselev, A., Koop,  
562 T., Kristensen, T. B., Krüger, K., Kulkarni, G., Levin, E. J. T., Murray, B. J., Nicosia, A., O'Sullivan, D.,  
563 Peckhaus, A., Polen, M. J., Price, H. C., Reicher, N., Rothenberg, D. A., Rudich, Y., Santachiara, G.,  
564 Schiebel, T., Schrod, J., Seifried, T. M., Stratmann, F., Sullivan, R. C., Suski, K. J., Szakáll, M., Taylor, H.  
565 P., Ullrich, R., Vergara-Temprado, J., Wagner, R., Whale, T. F., Weber, D., Welti, A., Wilson, T. W.,  
566 Wolf, M. J., and Zenker, J.: The Fifth International Workshop on Ice Nucleation phase 2 (FIN-02):  
567 laboratory intercomparison of ice nucleation measurements, *Atmospheric Measurement*  
568 *Techniques*, 11, 6231-6257, 10.5194/amt-11-6231-2018, 2018.

569 Freney, E., Sellegri, K., Nicosia, A., Trueblood, J. V., Bloss, M., Rinaldi, M., Prevot, A., Slowik, J. G.,  
570 Thyssen, M., Gregori, G., Engel, A., Zancker, B., Desboeufs, K., Asmi, E., Lefevre, D., and Guieu, C.:  
571 High Time Resolution of Organic Content and Biological Origin of Mediterranean Sea Spray Aerosol,  
572 ACP, 2020.

573 Fuentes, E., Coe, H., Green, D., de Leeuw, G., and McFiggans, G.: Laboratory-generated primary  
574 marine aerosol via bubble-bursting and atomization, *Atmos. Meas. Tech.*, 3, 141-162, 10.5194/amt-  
575 3-141-2010, 2010.

576 Irish, V. E., Elizondo, P., Chen, J., Chou, C., Charette, J., Lizotte, M., Ladino, L. A., Wilson, T. W.,  
577 Gosselin, M., Murray, B. J., Polishchuk, E., Abbatt, J. P. D., Miller, L. A., and Bertram, A. K.: Ice-  
578 Nucleating Particles in Canadian Arctic Sea-Surface Microlayer and Bulk Seawater, *Atmos. Chem.*  
579 *Phys.*, 17, 10583-10595, <https://doi.org/10.5194/acp-17-10583-2017>, 2017.

580 McCluskey, C. S., Hill, T. C. J., Malfatti, F., Sultana, C. M., Lee, C., Santander, M. V., Beall, C. M.,  
581 Moore, K. A., Cornwell, G. C., Collins, D. B., Prather, K. A., Jayarathne, T., Stone, E. A., Azam, F.,  
582 Kreidenweis, S. M., and DeMott, P. J.: A Dynamic Link between Ice Nucleating Particles Released in  
583 Nascent Sea Spray Aerosol and Oceanic Biological Activity during Two Mesocosm Experiments, *J.*  
584 *Atmos. Sci.*, 74, 151-166, <https://doi.org/10.1175/JAS-D-16-0087.1>, 2017.

585 Ovadnevaite, J., Manders, A., de Leeuw, G., Ceburnis, D., Monahan, C., Partanen, A. I., Korhonen, H.,  
586 and O'Dowd, C. D.: A sea spray aerosol flux parameterization encapsulating wave state, *Atmospheric*  
587 *Chemistry and Physics*, 14, 1837-1852, 10.5194/acp-14-1837-2014, 2014.  
588 Pujo-Pay, M., Conan, P., Oriol, L., Cornet-Barthaux, V. C., Falco, C., Ghiglione, J.-F., Goyet, C., Moutin,  
589 T., and Prieur, L.: Integrated Survey of Elemental Stoichiometry (C, N, P) from the Western to Eastern  
590 Mediterranean Sea, *Biogeosciences*, 8, 883-899, <https://doi.org/10.5194/bg-8-883-2011>, 2011.  
591 Rasse, R., Dall'Olmo, G., Graff, J., Westberry, T. K., van Dongen-Vogels, V., and Behrenfeld, M. J.:  
592 Evaluating Optical Proxies of Particulate Organic Carbon across the Surface Atlantic Ocean, *Frontiers*  
593 *in Marine Science*, 4, 367, 2017.

594
